# Supplementary material
Source: MDPI journal article supplement (https://www.mdpi.com/2071-1050/11/19/5316)
Supplement: s1 [file s1]

### Supplementary information

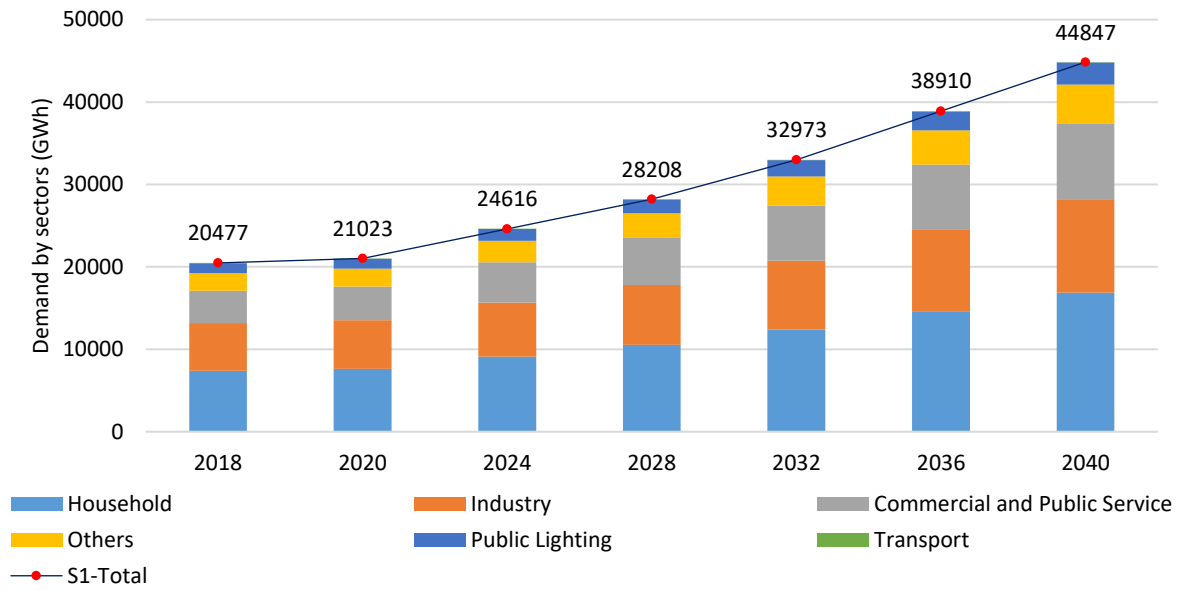

**Figure SI1.** Electricity demand by sectors in the S1 scenario from 2018 to 2040.

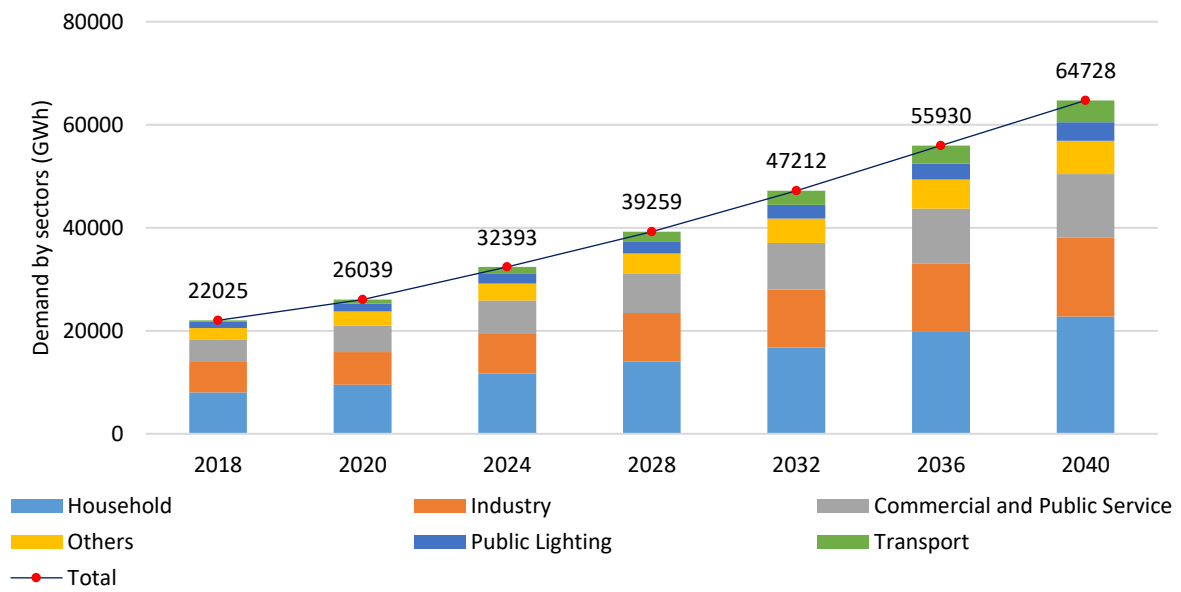

**Figure SI2.** Electricity demand by sectors in the S2 scenario from 2018 to 2040.

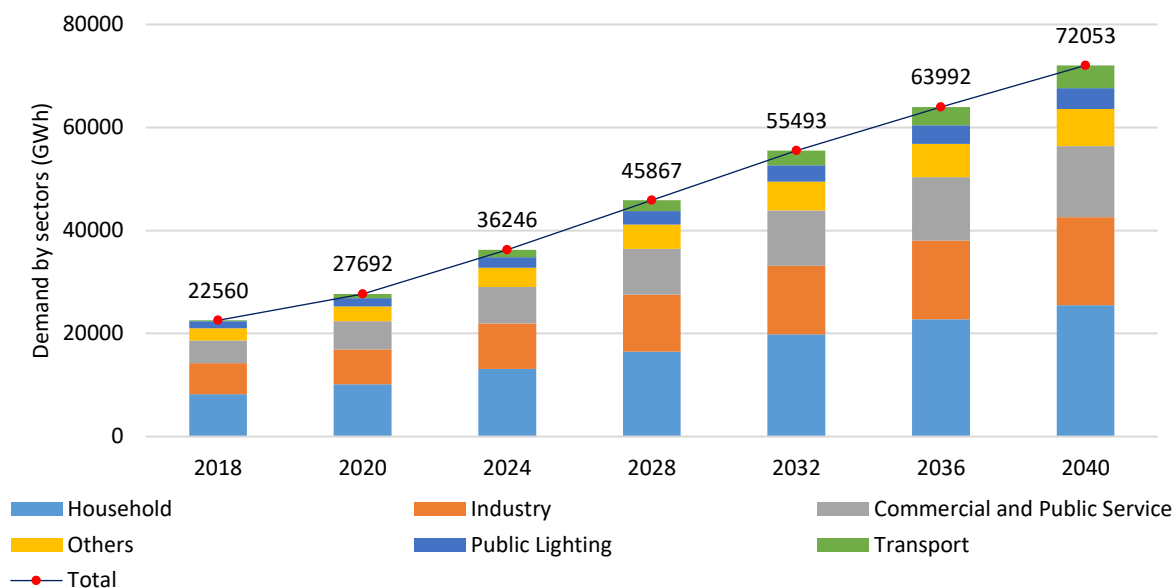

**Figure SI3.** Electricity demand by sectors in the S3 scenario from 2018 to 2040.

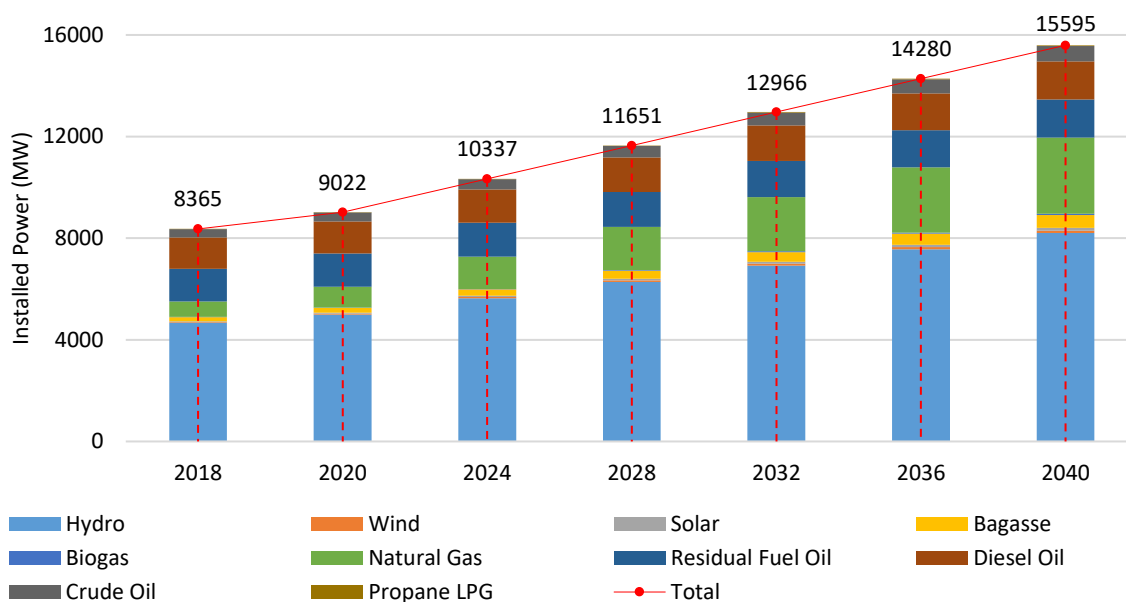

**Figure SI4.** Installed power capacity by sources in the S1 scenario from 2018 to 2040.

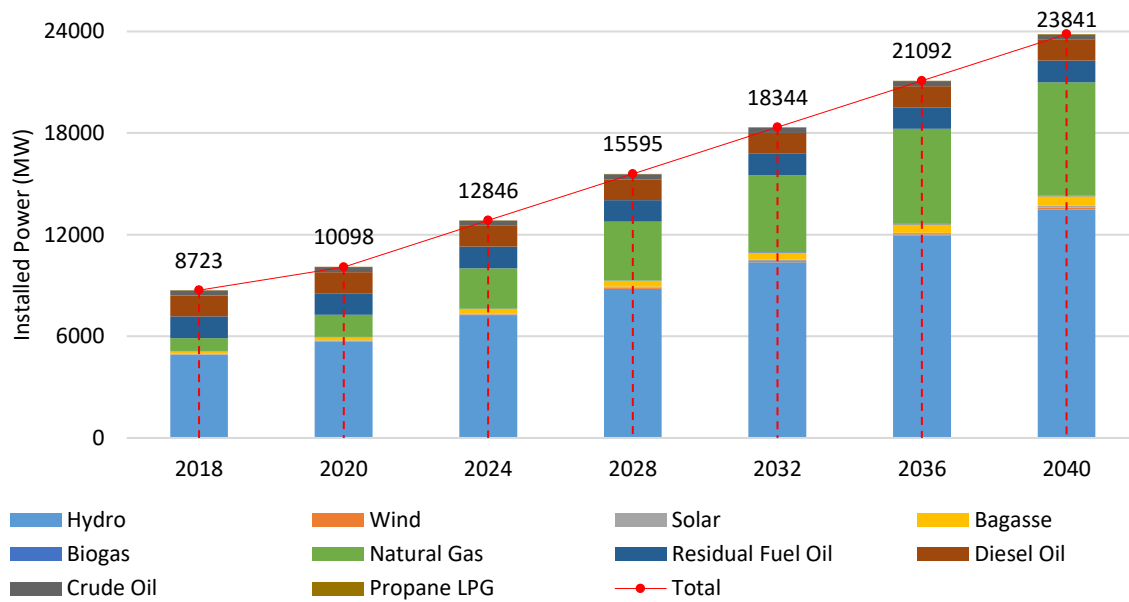

Figure SI5. Installed power capacity by sources in the S2 scenario from 2018 to 2040.

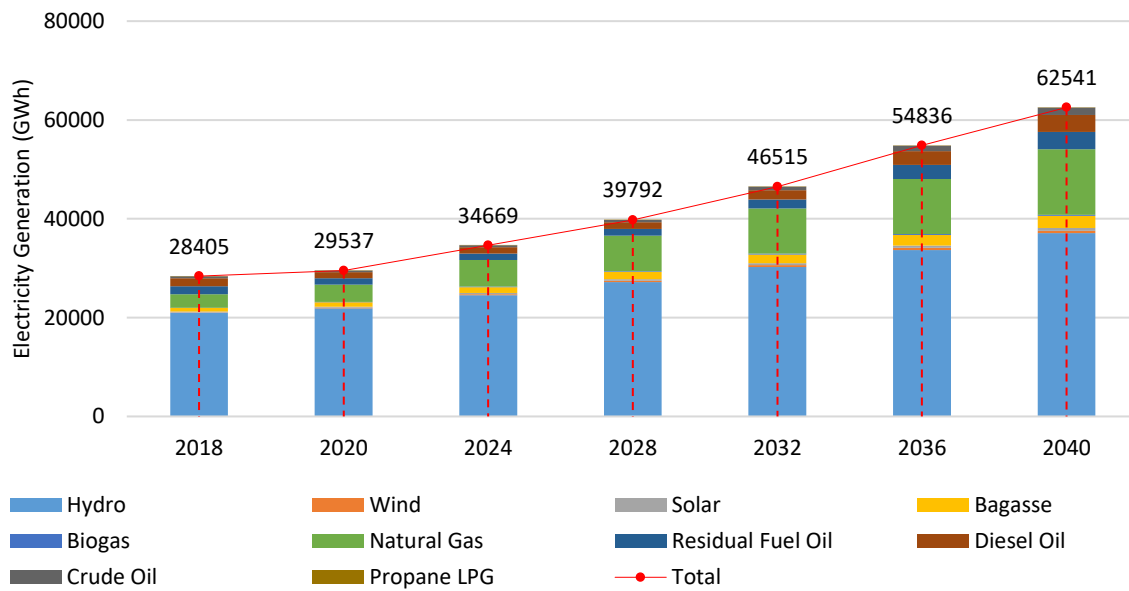

Figure SI6. Electricity generation by sources in the S1 scenario from 2018 to 2040.

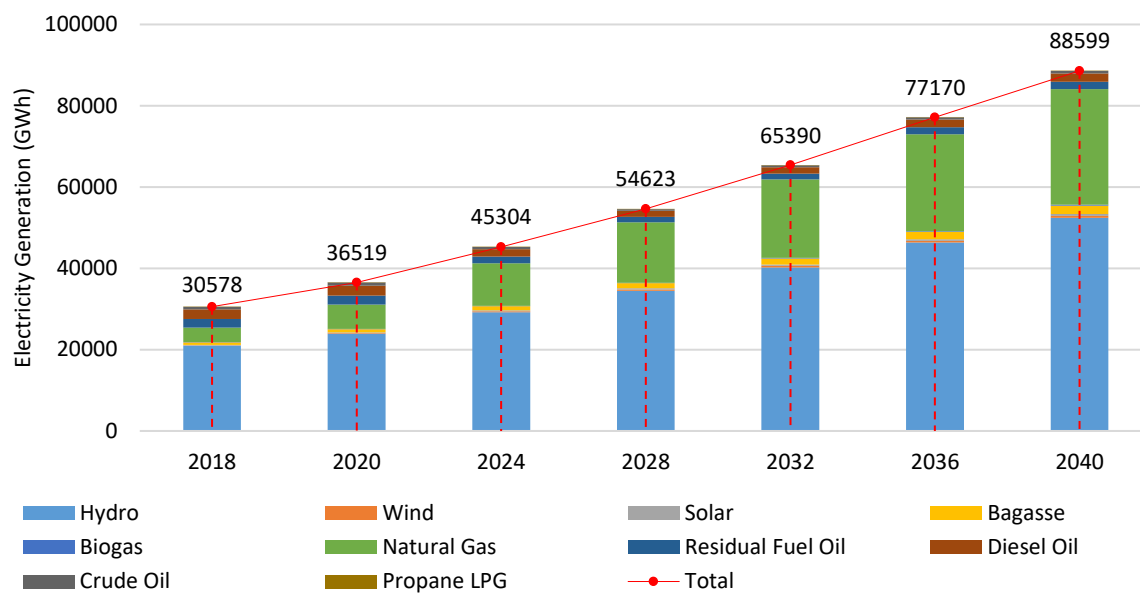

**Figure SI7.** Electricity generation by sources in the S2 scenario from 2018 to 2040.

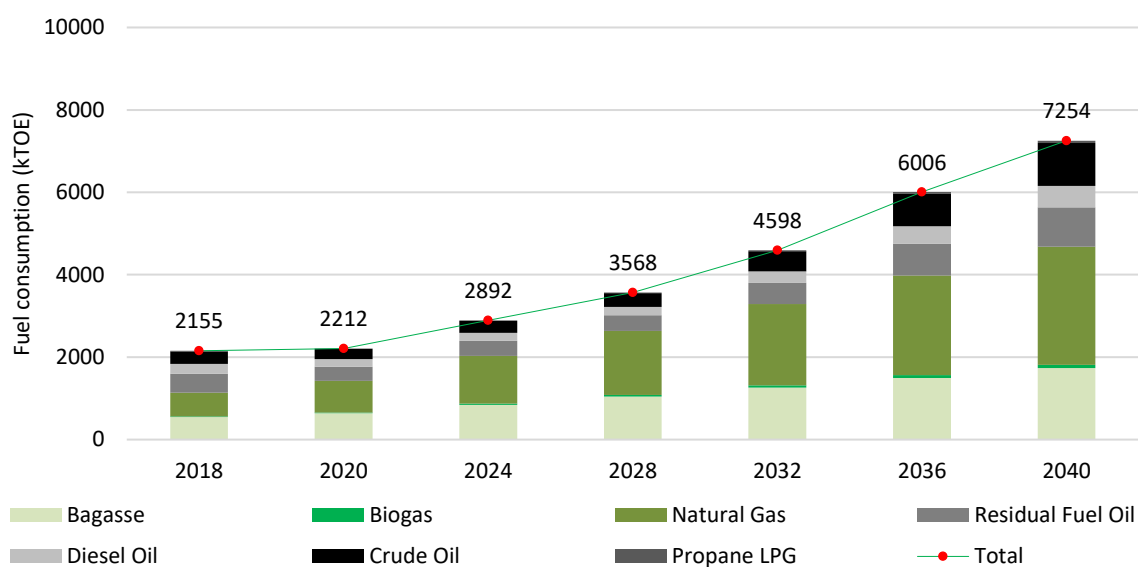

**Figure SI8.** Total fuel consumption in the S1 scenario for electricity generation from 2018 to 2040.

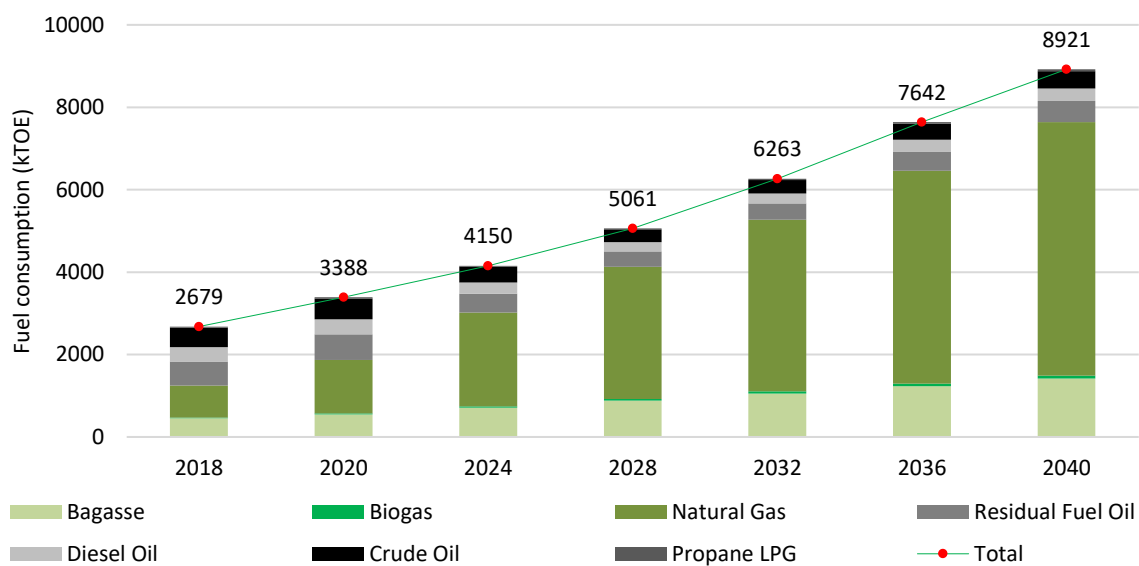

**Figure SI9.** Total fuel consumption in the S2 scenario for electricity generation from 2018 to 2040.
